# Supplementary material for: Assessing the Potential of Using the Langdon 5D(5B) Substitution Line for the Introgression of Aegilops tauschii Into Durum Wheat
Source: Front Plant Sci. 2022 Jul 7;13:927728. doi: 10.3389/fpls.2022.927728 (PMC9302120; doi:10.3389/fpls.2022.927728)
Supplement: Supplementary file 2 [file Table_1.XLSX]

## Sheet: Sheet1
List of KASP markers used: for each KASP marker; the physical position in the wheat reference genome sequence and the common and flanking sequnces.
Marker ID	Chromosome	Physical position (bp 10e-7)	Primer_AlleleFAM	Primer_AlleleHEX	Primer_Common
WRC1089	1D	5.07061	AACGGCATGGTGCTCGGCAT	ACGGCATGGTGCTCGGCAG	CTTCTAGACGCAACGCAAGCCGTT
WRC1418	1D	6.01756	ATAGAAACAGGGAGGGAGGT	ATAGAAACAGGGAGGGAGGC	GCCGGAGAAAACGATGGAGA
WRC1328	1D	12.0601	GCCAGCGACTTCACATCCGT	GCCAGCGACTTCACATCCGG	CTCGCTCAATCTCTCGTTC
WRC1599	1D	18.1619	CTAGAAGTAATCTTGCATGCACA	CTAGAAGTAATCTTGCATGCACC	ACTGAGGCATGCACCGAAG
WRC1734	1D	18.2528	AAGTGAGATGGACTGGGCAG	AAGTGAGATGGACTGGGCAA	CAGCTGTGAGTCAGTGGTCA
WRC1420	1D	25.1708	CACAAAAAGGGTCAATTGATGTAGA	CACAAAAAGGGTCAATTGATGTAGG	TGGCACCCTTACAATGCTCT
WRC1735	1D	30.3026	CCGGAGTACAACAATCTCTACAGC	CCGGAGTACAACAATCTCTACAGT	TGGCACTATCAAGTCACGGT
WRC1422	1D	35.0258	ATCACTGTACGCGCACAATC	ATCACTGTACGCGCACAATT	TCCTGTAGCCCTGAGAGAAGA
WRC1736	1D	35.3656	TCCTTCTACCCAACCGACTA	TCCTTCTACCCAACCGACTG	CGCCAATTCATTGATTTCAGCA
WRC0135	1D	36.4385	ACCACACATGGATACCAAGCTATCA	CACACATGGATACCAAGCTATCG	CTCATCAAGCTCATCAGGGTGTGTA
WRC0138	1D	39.3306	CCAAACAGGCAGTAGATTATTGCAGT	CAAACAGGCAGTAGATTATTGCAGC	AACCGAGTGCARCGCTCACCTT
WRC0139	1D	40.5765	GGATCCAGCAAGCACGCG	CTGGATCCAGCAAGCACGCA	CGCTCTCTTCCATGGCGACAAC
WRC0141	1D	44.8014	ATAGGTCCAGACACAATGATTATTTCG	AAAATAGGTCCAGACACAATGATTATTTCA	GAGCGGGCTCTCTTCTGGGATT
WRC1214	1D	46.2204	TTGTGATCGGACGTTGGTGTC	CTTTGTGATCGGACGTTGGTGTT	GAGAAGCCGTCGAGAGGGGAAA
WRC1896	1D	46.6496	CCCGACGATGGAAAGAATTGA	CCCGACGATGGAAAGAATTGG	TCTTCGATGACGGGTTTGCT
WRC1897	1D	46.7109	AAGTGAGCACTGGTTGGTTT	AAGTGAGCACTGGTTGGTTG	GCGACATGAGCTGAGCATTG
WRC0143	1D	47.7908	AGTAGCCATAGTATTGATGCTAGTTTC	CAGTAGCCATAGTATTGATGCTAGTTTT	GCGCCAGGAGGTGGCCCAA
WRC1425	1D	49.3708	CCTTGTGTCTTGTGAATGCAAAA	CCTTGTGTCTTGTGAATGCAAAT	TGATGTCGCCATGTTTGCTT
WRC0250	2D	0.236311	TGTGCCAGGGGCACTCCT	CTTGTGCCAGGGGCACTCCA	CGACGACGGTGCCGAGAAGAA
WRC0260	2D	13.2699	ATCTTGTCTCCGTCTCCTTYTTGAAT	CTTGTCTCCGTCTCCTTYTTGAAC	CGGGTACTCAAGCAAACTCGAATTGAT
WRC0261	2D	15.9852	ATATCCACAAATGAGTAACTCAAATCG	ACTATATCCACAAATGAGTAACTCAAATCA	ACTCGACAATGTACTACGCGTGGT
WRC0262	2D	17.0104	GTTAGCTTTGCAAGGGGTTCCTG	GTTAGCTTTGCAAGGGGTTCCTA	TCTCCTTGTAGAAACTTTTCAATGTATGGT
WRC0264	2D	22.9796	GCATCCAGTTCTCCGGTTCAAC	GCATCCAGTTCTCCGGTTCAAG	CSAAAATACTTGCAGGGCAAGAGCTT
WRC0270	2D	30.5902	GGAATGTGAACGCATGTGAATAGG	GGGAATGTGAACGCATGTGAATAGA	AAGTATATCCTGTTGCCGGATATTYTACAA
WRC0271	2D	31.7266	TAGTCAGTATGCTGTCACAAAATTT	CTTAGTCAGTATGCTGTCACAAAATTC	GGTGCCATTGGAAGCGAGAAACATT
WRC0275	2D	38.2181	GTATACTGATGTGATCCCATCATAGA	GTATACTGATGTGATCCCATCATAGC	GATGGACAGCAAGACTGCTACATAC
WRC0276	2D	41.0419	AACTCAGGTGAATTTGCCGAGTTCT	CTCAGGTGAATTTGCCGAGTTCC	CATGGCCAGAGGGCAATCACC
WRC0277	2D	42.2882	AACTTAGCTTACATTCCACACCGTG	GAACTTAGCTTACATTCCACACCGTA	TTTCTTTTTTCCCGATGAAGCTGTGTT
WRC1600	1D	45.1061	TCTTTGACATCGTGTTTTTGCG	TCTTTGACATCGTGTTTTTGCC	AGACTGATGACCACCACACG
WRC0280	2D	48.0501	TCTGGATGTTGTTTTGCGCCAG	CTGGATGTTGTTTTGCGCCAC	TACRATGCTATACTTCCAGGAAACATCTT
WRC0282	2D	52.6516	GAAGTATCTTCTCAAGGAACTCCTTG	GAAGTATCTTCTCAAGGAACTCCTTA	CTCCTGGAATGATGCAATGGGTCT
WRC0284	2D	54.951	AATCGTCTTCCAGCGCCGTGAT	CGTCTTCCAGCGCCGTGAC	CCCCACCTTCAAGCCCATGTCAA
WRC0291	2D	62.1978	TTATTTGAAGTTATTCGGTAAATATGGAC	CTTTATTTGAAGTTATTCGGTAAATATGGAT	CCTGACACCTTAAACATTACTAGT
WRC0292	2D	62.7168	GGTGCACTAAGTTGAGGACACTG	GGTGCACTAAGTTGAGGACACTA	CAAGTGAGAGGATCAACAGGGATCT
WRC0391	3D	1.41504	AACACAATCAGAACCAAACATGTGAAG	AACACAATCAGAACCAAACATGTGAAC	AATTATGTGACTTATGTAATATRGTACCTG
WRC0395	3D	2.61652	AGCCGTYGGCCTTGGATACAG	GAGCCGTYGGCCTTGGATACAA	CAGAAGAATACAGCATTCCTGTCAGG
WRC0396	3D	2.7884	ATTCTTTTRTGACGAAGGGCACATC	CATTCTTTTRTGACGAAGGGCACATT	TCCTCRGAGATTTCAGTCAACTCA
WRC0404	3D	3.45606	AGTATCTTATGCCCTCGGGATCA	GTATCTTATGCCCTCGGGATCG	CAAATTCCATGAGGGCAAACAAGACCA
WRC0399	3D	8.46735	GCAGCTTCCTTCATCATGTCCG	GCAGCTTCCTTCATCATGTCCC	AAGGGGCTCTTCTTGGATAAAWCATCATA
WRC0400	3D	8.46736	CAAGCTGGCTGCATATGACAAGTT	AAGCTGGCTGCATATGACAAGTC	CTGGCAGATTTTCCAGTCARGCTATT
WRC0401	3D	9.52455	TTAGGCCTTATGTTTGTCAAGTGTCA	AGGCCTTATGTTTGTCAAGTGTCG	TGACTACACATTTTACCCCGCCAAAAAAT
WRC0403	3D	13.05	AAGCATTATGAATGCACAGACGACG	AAGCATTATGAATGCACAGACGACC	TGTATACAGAGAATACATGGGTTTCCGTA
WRC1218	3D	27.8975	CCCAGATCAGCCGTGCTTACA	CCCAGATCAGCCGTGCTTACG	GATGGAGCCAACATCCACCCCAT
WRC0413	3D	32.7721	CAGCTCCGTTTCTCCCACTC	GTCAGCTCCGTTTCTCCCACTT	AGCACAAGTCAACAAGCCTCAGAAC
WRC0425	3D	46.9385	AATCCTTTCTTGTGATCTTCAGGCC	CAATCCTTTCTTGTGATCTTCAGGCT	GTTGACGATGAAGTTGCCCATGAGA
WRC1253	3D	58.8323	AAGATTATTCAAGCAACTAACATCCCG	AAGATTATTCAAGCAACTAACATCCCC	CCGGATGAAGGAGCTAGTTGAGAT
WRC1352	3D	59.3485	TCTGAAGAACATTTCAGAGCACAA	TCTGAAGAACATTTCAGAGCACAG	CACTTTAGGCGCTCTATGAA
WRC0433	3D	60.0165	CCTCTCTTCCTCCATCACCAG	CTCCTCTCTTCCTCCATCACCAA	CGCTCGACCTCATAATTGTTTTSAAAGTA
WRC0435	3D	60.3543	CTTTTTGGTGCATTTCACCGTT	CTCTTTTTGGTGCATTTCACCGTC	CACCACAAAAAAGGAGTGACGATTATCTT
WRC1307	4D	0.310323	GTGACCTGTTCCCTGAACCTC	CGTGACCTGTTCCCTGAACCTT	GCCCAACTGGACCACAAAACGG
WRC1301	4D	0.313505	AACAAGAAGAAGAATGACCAAACGAG	AACAAGAAGAAGAATGACCAAACGAC	AGGAATTTGGGCGCAGGAAGGATTT
WRC1311	4D	1.67137	CATGTAGGCATGTATGCTCTCTTA	CATGTAGGCATGTATGCTCTCTTG	ACAAGATAAGACCGCAAAGT
WRC1312	4D	2.3224	TCATATACTCAGATGTCTTGCTTCT	TCATATACTCAGATGTCTTGCTTCC	ATGCTGTTGGAGAGTGGTGG
WRC1316	4D	4.93084	GCATGTATGCATGACCATTGAAT	GCATGTATGCATGACCATTGAAC	CATCCCAAGACACACCATC
WRC0523	4D	7.71261	GGTCCATCAGCAGCCCTGG	GGTCCATCAGCAGCCCTGA	GTTTCAGTTTTGAGAGACGAGGTTAACAA
WRC0527	4D	9.38446	CAAGTTTAGCTGATCAACATGCTGC	GCAAGTTTAGCTGATCAACATGCTGT	TCTTYGGCAGCTCCAGGAGCTTTT
WRC0533	4D	23.1216	GTGCGGATGGCGATGTTCCCA	GCGGATGGCGATGTTCCCG	CTCAGAGAAGCAATATGCTCCTCG
WRC0535	4D	23.5398	AGAATTYTTCATATGAGTAATCAAGATTGGTA	AGAATTYTTCATATGAGTAATCAAGATTGGTT	TARAGAGATTATAGGAATCGAAAGAGAAAC
WRC1368	4D	29.7206	CCAACAGCTCAATAGTGCG	CCAACAGCTCAATAGTGCA	AGATTTTCAGGCTTCAGG
WRC0543	4D	34.1412	CCGTAGGAATCATCTGTGTAGCC	CCGTAGGAATCATCTGTGTAGCG	CTCAGTTGAGCGGACTGTGAAAATGA
WRC1130	4D	45.5342	ATCCCTCGACTCACGGTACTG	CTATCCCTCGACTCACGGTACTA	CCCCGAGGACACAAAAAATGTCGTT
WRC1290	4D	45.5344	CCAAGCGGAACATGAGTGGATAA	CCAAGCGGAACATGAGTGGATAG	TGTCAAACACTACATCCATTGTCACCAAA
WRC1370	4D	48.0874	AAATTCTCAGTTCTGCCTGGT	AAATTCTCAGTTCTGCCTGGC	GGAAGAAACAGCACAGCGA
WRC1198	5D	0.303175	CCTCATGCTCACAGCCGCC	CCTCATGCTCACAGCCGCT	TTTCCAGTCACCTGGCCCACAAAAT
WRC0666	5D	0.3032	CGCTACAAGAGCAAGGAGA	CTCGCTACAAGAGCAAGGAGG	CCACCACCACCAAAACAACATTGAA
WRC1919	5D	0.669352	CGATTTGGAAGAGAAGTGACCAC	CGATTTGGAAGAGAAGTGACCAG	GGTATGGCAGGATGTTCAGCT
WRC1922	5D	1.05436	TCTGTTCCAATTTCTTCTTCTTCAT	TCTGTTCCAATTTCTTCTTCTTCAC	GCTTGCTAGGGGTTCCTACC
WRC1924	5D	1.16146	CGATTGGAGTTGTTGTGCTTCG	CGATTGGAGTTGTTGTGCTTCC	GCCCCGTCACAACAAACAAA
WRC0669	5D	2.45741	TGAAAAGCTCAGTAGTGGCAACAA	GAAAAGCTCAGTAGTGGCAACAG	GCTGGATGGCGGATTCAAGAGCT
WRC1925	5D	3.3681	AACAAATTTCCTAGTCCGATGTTC	AACAAATTTCCTAGTCCGATGTTG	CGTATTGTGGCGACCGAAAA
WRC0672	5D	4.31005	AAGGGATAGATGTTGTATACTTGCCAT	AAGGGATAGATGTTGTATACTTGCCAA	ATGTGATCAAGATAGATGGGTACTCAAG
WRC1926	5D	4.53677	CACATGTTAGATTTTTCGCATCGG	CACATGTTAGATTTTTCGCATCGA	TGTGTTTGAGCAAAGGTGTTGA
WRC0673	5D	4.6981	CAACGCAGACGGAGCTGTTCATA	AACGCAGACGGAGCTGTTCATG	TGCCGGCCGTCGTCRTCC
WRC1927	5D	5.61194	CACCGTCAGTCAATATTGTGAGC	CACCGTCAGTCAATATTGTGAGT	TCAAAAGTCCACCGACGAAA
WRC1539	5D	6.00277	TGTTAGGCTTCAAGTTCTTCACTTC	TGTTAGGCTTCAAGTTCTTCACTTT	TGGTCCGCTTTTGTGTACCT
WRC0675	5D	7.62038	GGAAATCATGGAGCGTGCTTCC	GGAAATCATGGAGCGTGCTTCT	GCGGGATTCCCCGGTCGGAT
WRC0676	5D	7.62039	GAAGCTCTTTGCCTATATATGGAGAAAAT	GAAGCTCTTTGCCTATATATGGAGAAAAA	TGTGTCAGTTCCARTGTGGTTCATGTA
WRC1928	5D	9.88133	ACAGAAGAAAGGAGACTCTAAGGAT	ACAGAAGAAAGGAGACTCTAAGGAC	AGTCAGCACGCTCTTGAAGA
WRC1929	5D	11.8454	TGATTTTGCAAAGTCCTGAACTT	TGATTTTGCAAAGTCCTGAACTC	CTTTCTCTCGTGTTCCGGGA
WRC0681	5D	17.0317	GTGGTTGATTGGTGGCTCTGA	GTGGTTGATTGGTGGCTCTGG	CGCAAATTCGATGAAAAGAACCGCAG
WRC1931	5D	20.0048	GTGACGGCCGGTATTGGTC	GTGACGGCCGGTATTGGTT	CCCCTACAAGACCAACAGGG
WRC1932	5D	22.0197	GGAGGGCTTTTTCATAGACATAGAG	GGAGGGCTTTTTCATAGACATAGAA	CCCCTCCACCGAAAGAACTC
WRC1933	5D	24.86	GGTGTTGGAGGAGGTAGATTCTG	GGTGTTGGAGGAGGTAGATTCTA	GGGCATGAGCAAACTGAACC
WRC1934	5D	25.631	CCACTCTTCTTTATATAGACCTCCA	CCACTCTTCTTTATATAGACCTCCC	GGTCCTCTGGTGTAGAAGTCC
WRC0690	5D	27.3533	CAYCGAGGCGGGCGTCG	CAYCGAGGCGGGCGTCC	TWTCGCATGGGGTCGAGCGTG
WRC0692	5D	27.3534	CGAACTCGTGGGGGTTGACG	ACGAACTCGTGGGGGTTGACA	GAGACCGCGGCCTCCACC
WRC1935	5D	27.4579	TGCGAAGAGAGCAAATGCAAA	TGCGAAGAGAGCAAATGCAAG	CACAGGAGCTAGCCATGCTT
WRC1540	5D	30.1107	TCAGAACTGAAGTTTGCCACG	TCAGAACTGAAGTTTGCCACC	TGACATGCCGCGTTTTGAAG
WRC1937	5D	31.3138	GACCAGTAACTGCAGACCGT	GACCAGTAACTGCAGACCGC	GAGGCTGCTGTTAGCGATCA
WRC1938	5D	32.1795	TGAGAAGTTACACCTATGCAAGC	TGAGAAGTTACACCTATGCAAGT	GCCCCCATAACACAGGATCA
WRC1939	5D	33.0302	GTGTTCGTCACCGGCCAAT	GTGTTCGTCACCGGCCAAA	ACCTTGCTGTACCTGCCAAA
WRC1940	5D	34.0512	CCGTCGTACGTCGTACCAC	CCGTCGTACGTCGTACCAT	AAACACACACGCACATGGTC
WRC0697	5D	34.6675	TTACTCTTAAATGCTGAAATGTTCGTC	CTTTACTCTTAAATGCTGAAATGTTCGTG	CATCTTATCGCCCTTGCCTCRGTT
WRC1541	5D	35.4269	TGATTGATACTCGTTGTCGATGC	TGATTGATACTCGTTGTCGATGG	GGCCCAATCAAAACAGAGCC
WRC0701	5D	39.6452	TTGTACTTTTAAGCTGCCACATCTCA	GTACTTTTAAGCTGCCACATCTCG	RACAGGTTTTGTACAATTTTACAAATCAA
WRC1943	5D	40.2707	AGGAAGAGGAAGCCACCCC	AGGAAGAGGAAGCCACCCT	TAGGGGATCTCGCTGTCCAA
WRC1658	5D	40.821	GAGGCCCCTGATTGCTCA	GAGGCCCCTGATTGCTCG	GAAAACTCCAGCACGCGTG
WRC1944	5D	41.0241	CGACAATTGAGTAGAAAAGGATGA	CGACAATTGAGTAGAAAAGGATGG	GAGAAAGCAGAGCAGCTCGT
WRC1945	5D	42.1168	GTAGGACGAGGGCTTCTTCTC	GTAGGACGAGGGCTTCTTCTG	GCAGAGGGAAGAGGAAGGC
WRC1946	5D	42.929	TTGATCGATACATAGCAGCACT	TTGATCGATACATAGCAGCACC	GCGCCAGTATGTGCAATTGA
WRC1947	5D	43.0085	TTCCGTTCAATTTGGCCTAGG	TTCCGTTCAATTTGGCCTAGA	TCAAATGACCAGTGCTTGCA
WRC1948	5D	43.0524	AAACAGTTGCCTGCATGAGG	AAACAGTTGCCTGCATGAGA	GGCTCAGCAGGTGTTGGTAA
WRC0704	5D	43.4546	CGGAAGTACAGCCGGGATCCA	GGAAGTACAGCCGGGATCCG	CAGACGTTGCCGGGGACATGAA
WRC1155	5D	44.0374	CGCTACCAATCAGGACTCCTG	CGCTACCAATCAGGACTCCTC	AGGAAATTCCCATCACAGTTCAAATGTTAT
WRC1949	5D	48.0457	GGGGTTTAGGGTTTAGGAAGACAA	GGGGTTTAGGGTTTAGGAAGACAT	CCGTGTTTGTTGCTCAGTTGT
WRC1950	5D	49.0046	GGTGAGAAGCCTTCTAGAAAGTTTC	GGTGAGAAGCCTTCTAGAAAGTTTA	ACACCGAGCACAAACCTTGG
WRC1542	5D	49.0511	GCATGCATCGTCACCATTTCAC	GCATGCATCGTCACCATTTCAT	CGTTCATGGATTCAGCCTCCT
WRC1660	5D	50.3657	GCCCTAAGGTTCAAACTTTGATCTT	GCCCTAAGGTTCAAACTTTGATCTG	GTCTCCTGTCAGGCTGTGAA
WRC1147	5D	54.5933	CACTGGCTGATCGAGCTGGAG	CACTGGCTGATCGAGCTGGAT	TTAGTGTTGGGGATTCCCTTACTTTCTT
WRC1148	5D	54.6651	ATGTAGGCAGTAGCATTCTCGTAAG	ATGTAGGCAGTAGCATTCTCGTAAC	CTGAAAGCTCCATGTTTTTAGTTCGTGTT
WRC1281	5D	54.7505	CCATATATCCATATTTCCTTTTCAGTGG	CCATATATCCATATTTCCTTTTCAGTGC	GCAAATTTCAAAGCTAGTGTAGCCAAGTA
WRC1152	5D	54.8879	CCAAAGAACGGCACGACCGTG	ACCAAAGAACGGCACGACCGTA	ATGGAAACTAGTCGACGTCGCCTTT
WRC1953	5D	55.0188	CTCCTGTTACTTTCTTTCCAGATTT	CTCCTGTTACTTTCTTTCCAGATTC	AGTGATGTCCCTGCAGTTCT
WRC1295	5D	55.204	AAGCTTTGTATCGGAGAATTATGCGTA	GCTTTGTATCGGAGAATTATGCGTG	GGACGCAGCTACAAAGCTTGAAGTT
WRC1151	5D	55.8081	CACACACCACCACCAAGTACAG	CACACACCACCACCAAGTACAC	ACGTACGGTGTGGGCTTAATGCATA
WRC1153	5D	55.9846	ATTATCACCTGTGGCTGTGCTGT	ATCACCTGTGGCTGTGCTGC	ACGCAGACAAGCAAACGGTACAGAA
WRC0711	5D	56.5202	CAGGTGAAGCTTTCCATCATGGAA	AGGTGAAGCTTTCCATCATGGAG	GTCGTGCAACTYGTTGGCGAGA
WRC0811	6D	0.391742	GGATGGATCRAAATCTTGGCAATCG	AGGATGGATCRAAATCTTGGCAATCA	GGCAACATCTTCCAGGACTGYGAA
WRC0812	6D	0.556563	GGTGACGGCCTGCGACTGA	GTGACGGCCTGCGACTGG	CTAAAATTTCAGACTTCGGTTTGGCGAAA
WRC0816	6D	4.78069	GCATCCACATCATCAGTTTTATCACTT	CATCCACATCATCAGTTTTATCACTC	AACTGTCCAGAAGATGAAGATGTTGAGAT
WRC0819	6D	11.243	CATGTTGAATAAATGTACCTGAGTTGC	CATGTTGAATAAATGTACCTGAGTTGT	CRCCAATGTCAAGGGTCAAACAAAAGT
WRC0832	6D	29.032	GTGGCAAATTTATAGAAAGACCTTGC	CGTGGCAAATTTATAGAAAGACCTTGT	GGAGCAAGGAGATAAACATATAGCTGAAA
WRC0833	6D	29.1959	GTTGCTGCAACAACAAGAGAACCTTT	GCTGCAACAACAAGAGAACCTTC	GCTCACTGRTCTTCCGAGATGGTT
WRC1177	6D	31.8564	GTCGCCTTGCTCTCACTGTTTAA	GTCGCCTTGCTCTCACTGTTTAC	TGCGTTGTCGTTGATGGTCCATCTA
WRC1297	6D	38.5561	GATGGCACGCGCGCGTCAA	ATGGCACGCGCGCGTCAG	CGACGACTCTACGCCTCGAGAA
WRC0845	6D	40.665	GAGTGATGAAGAGGCAGATGGC	CGAGTGATGAAGAGGCAGATGGT	AGATGCAAGAGCTRTGAACCATACG
WRC1176	6D	45.5736	GAGAGTCGCCTCCTGTGCAGT	GAGTCGCCTCCTGTGCAGG	GGAGAGGAGAGGGGCCCGA
WRC0854	6D	46.2487	AGTTGTAGGTATGAGAATGTAACAGC	AGTTGTAGGTATGAGAATGTAACAGG	AAGAATGGTTCGATCCATTCTCMCTG
WRC1174	6D	46.5958	AATGTTTTTAGACATGGTGAGGCCG	AATGTTTTTAGACATGGTGAGGCCT	CAGGACACAGGTAGTCATCCTCAAA
WRC1175	6D	47.279	ATAGAAGGTAACTTGCGTCCGAATAAA	AGAAGGTAACTTGCGTCCGAATAAC	CATCCAAATAGTCATTGATGGGTTGCATT
WRC0955	7D	2.58409	CACTGAAGAAATGAARGTGGAACACA	ACTGAAGAAATGAARGTGGAACACG	TAATCTCCTCCGCAAGCAGAC
WRC0964	7D	17.8559	GCGAAGTCAAGATTGTCTGTGATGA	CGAAGTCAAGATTGTCTGTGATGG	TCAGCAGTCGTCGCCGCTGT
WRC0965	7D	18.0931	TGATGGATCTGGTCAAGGAATGC	GTTGATGGATCTGGTCAAGGAATGT	ATCAGTACCTAGTAGTCATACACAATCT
WRC0980	7D	38.8593	CACAAGGAAAGAAACTGTTCGTCC	CACAAGGAAAGAAACTGTTCGTCG	GTGCATTTGYCTTTTGACGATAAACGTTTT
WRC0981	7D	42.0694	CCTCCTGAACTTGAGTCGTCGT	CTCCTGAACTTGAGTCGTCGC	GCTATGGACCCTACGGGAGCAT
WRC0982	7D	44.5855	AGTCGTAGAAGAAAACATCAGGGG	AGTCGTAGAAGAAAACATCAGGGC	CTGCATGCTAGAGAACARCAGCCAA
WRC0983	7D	44.5855	TGTCAATTTGCTTGGCTATGATATTTCT	GTCAATTTGCTTGGCTATGATATTTCC	TTGTATGAGGGGAAGATGATGACAGAA
WRC0984	7D	45.9036	CGGTTATAGGAACCTCTGATCTTG	CGGTTATAGGAACCTCTGATCTTC	CAGAGTAAAGATGGCAAGAAAGAGAACAT
WRC0985	7D	45.9757	CAGAGTACTTGACACTGTGCAAT	CTCAGAGTACTTGACACTGTGCAAA	CCTTCGATGGSCAGAGCTTGAAG
WRC0994	7D	59.1259	CACATTCTTTGGGGCACAGATCC	CACATTCTTTGGGGCACAGATCA	CGAAGAGGCCCAYGGTGGCAA
WRC1650	5B	0.348083	GCCCCTAATTAACTAAGTGTCCAAA	GCCCCTAATTAACTAAGTGTCCAAT	TGTATTTTTGTCTAGCCCATGCA
WRC1798	5B	0.506654	GCATAATACTCCTTGCCCTCCTA	GCATAATACTCCTTGCCCTCCTG	GGCCATCATCAACGACCTCA
WRC1286	5B	1.4226	CCGCATCTGTGGCGACGGT	CGCATCTGTGGCGACGGC	CCTCATCATCGCCCTCGTCCTT
WRC1142	5B	1.55533	ACGAACTGAGGATATGAACGACTC	GACGAACTGAGGATATGAACGACTT	TCATCGATACCGCTGCGTGTACATT
WRC0614	5B	4.13153	CCCGTAAGTTTGTTTGTGGAAATGAC	CCCGTAAGTTTGTTTGTGGAAATGAT	TGAATGGCATTCCACGAAATTCAGAGAAT
WRC1303	5B	4.52377	ACAGGAACAGTAAGGTCGGCTC	ATACAGGAACAGTAAGGTCGGCTT	CATCATATGCTGCTTCGTCACTGTCAT
WRC0617	5B	8.79756	GATAAAACAAGTAAGGCTCCAATATCCAT	AAAACAAGTAAGGCTCCAATATCCAG	CATTAGGGTGGTTGAGCAAGGTGG
WRC1528	5B	10.1323	CGGAGTCGTCGTGTTCTCT	CGGAGTCGTCGTGTTCTCG	CCGGTGATGGATTTGGGACA
WRC0619	5B	17.4352	GTACAGTTTTTGTGAGGTGGAGGA	ACAGTTTTTGTGAGGTGGAGGG	GACGACAAGACTTCCAGACTCAATG
WRC1530	5B	25.4333	GTGGAGATCCTGGACACCAT	GTGGAGATCCTGGACACCAC	GCAGCTTTTGGGCTTCTCAC
WRC1531	5B	30.8541	TAAGCCTACAAAAGCCACGT	TAAGCCTACAAAAGCCACGC	GGTTCCAGTCTTGCATCACAC
WRC0634	5B	35.6717	GCGCCCATCACCGAACTCG	GCGCCCATCACCGAACTCC	CTGGAAGCTGCATTCCTGGGCT
WRC0640	5B	44.1419	GCCTACGTGGCATACCTCTCTT	CCTACGTGGCATACCTCTCTG	GTGATGCTCCATGCGTTACCCTTAT
WRC1144	5B	45.5739	CGCTGAAAGCAACACACCTGACA	GCTGAAAGCAACACACCTGACC	TTGTTGAGGAACATCAACATCCCTAGTAT
WRC1652	5B	45.7124	CTGAATTGTGGAACCTTCTCATTC	CTGAATTGTGGAACCTTCTCATTT	AGCTGACTGGAGTGAGTGGT
WRC0644	5B	48.5656	GTAGGTCTTGGTGCTCAACGAG	GTAGGTCTTGGTGCTCAACGAC	ACAGCCTTCGGCAGTGGTGGAA
WRC0645	5B	48.5656	GGCTCTACACCACGAGCTTCA	GGCTCTACACCACGAGCTTCG	ACCTGGCCGAGCGCGAACTT
WRC1145	5B	54.0266	CACCATATTCAGATAGGTAGCTCAG	ACACCATATTCAGATAGGTAGCTCAA	ATTAGGTTGTTTCCGAAGAATCTGGGTT
WRC1535	5B	54.037	CCACTTATACCGTTATAGCTAGGTG	CCACTTATACCGTTATAGCTAGGTT	GCATGCATCACCACTGACTG
WRC1803	5B	54.1099	TGAAAGATGGCTGGAGCATTG	TGAAAGATGGCTGGAGCATTC	GTGATCCGTGTAGCCCGTAG
WRC1653	5B	54.5461	ACACGCGTCGGTATTCTTCA	ACACGCGTCGGTATTCTTCT	ACTGCACGTACCTGTGGAAG
WRC1247	5B	55.8347	TTGGCAGCAAGGTGGAGCAG	CTTTGGCAGCAAGGTGGAGCAA	GAGATCTGCAACCCCTCCTGCTT
WRC0653	5B	58.1819	ACTAGTCGACAGTTCATACATACTCA	CTAGTCGACAGTTCATACATACTCG	CCATGCTTTATGTTACACGGTACTGCT
WRC1536	5B	61.0929	CACTGGAACAAGGATGACACC	CACTGGAACAAGGATGACACT	GCATGGCTAACATTCAGCTGG
WRC1654	5B	61.1048	AGTCAGCTTATTTGTTGAGGTAAAG	AGTCAGCTTATTTGTTGAGGTAAAA	GGCACAGATCCTCAACCTGT
WRC1146	5B	63.8509	CACAGCGTTTCTGTAATGGAGTC	GTCACAGCGTTTCTGTAATGGAGTT	GACTTGGCACAAAAGTAGACATCAAAGTT
WRC1537	5B	66.0688	TACCTAGATGCATGCACCCG	TACCTAGATGCATGCACCCA	GCAGCAATATCATGTCGTTGTCT
WRC1655	5B	66.3795	GTTTGTTTCAACTTTAGAGACCAGG	GTTTGTTTCAACTTTAGAGACCAGA	CACCGGGACATGCTTCTTGA
WRC0661	5B	70.3097	CATGAAATTTTACACATGTAGTATACATACAT	CATGAAATTTTACACATGTAGTATACATACAC	CACTTCTATGTTTCGAAAMAATCTGGAAAA
WRC0664	5B	70.8407	CCATCAGTATACTACACCCACCC	CCATCAGTATACTACACCCACCG	CTATGCTTATTTGCTGGSCTTTTCAATTG
WRC1805	5B	71.0355	TGAGGCTCAATCTTGTGTTTTC	TGAGGCTCAATCTTGTGTTTTG	ACTCCAAAAATGTCCATTAGCATT
WRC1538	5B	71.1135	AGATTCTTCGTTATCTCCCTCTCT	AGATTCTTCGTTATCTCCCTCTCC	GGTTGCAAAAGGAATGCCACA
WRC1858	5B	71.1239	GGTTGCTGTCGTTGAATGACC	GGTTGCTGTCGTTGAATGACT	AACTGTCCCAACCATTCCGG
WRC1706	5B	71.1617	GCCCTCCATGATTTTGATTTTGAG	GCCCTCCATGATTTTGATTTTGAT	ATGCCATGTTGGGAGGCTAA
